# Supplementary material for: Biological properties of Staphylococcus virus ΦSA012 for phage therapy
Source: PubMed Central journal article supplement (PMC9734660; doi:10.1038/s41598-022-25352-6), 2022-12-09
Supplement: 41598_2022_25352_MOESM1_ESM.pdf [file 41598_2022_25352_MOESM1_ESM.pdf]

Figure.S1

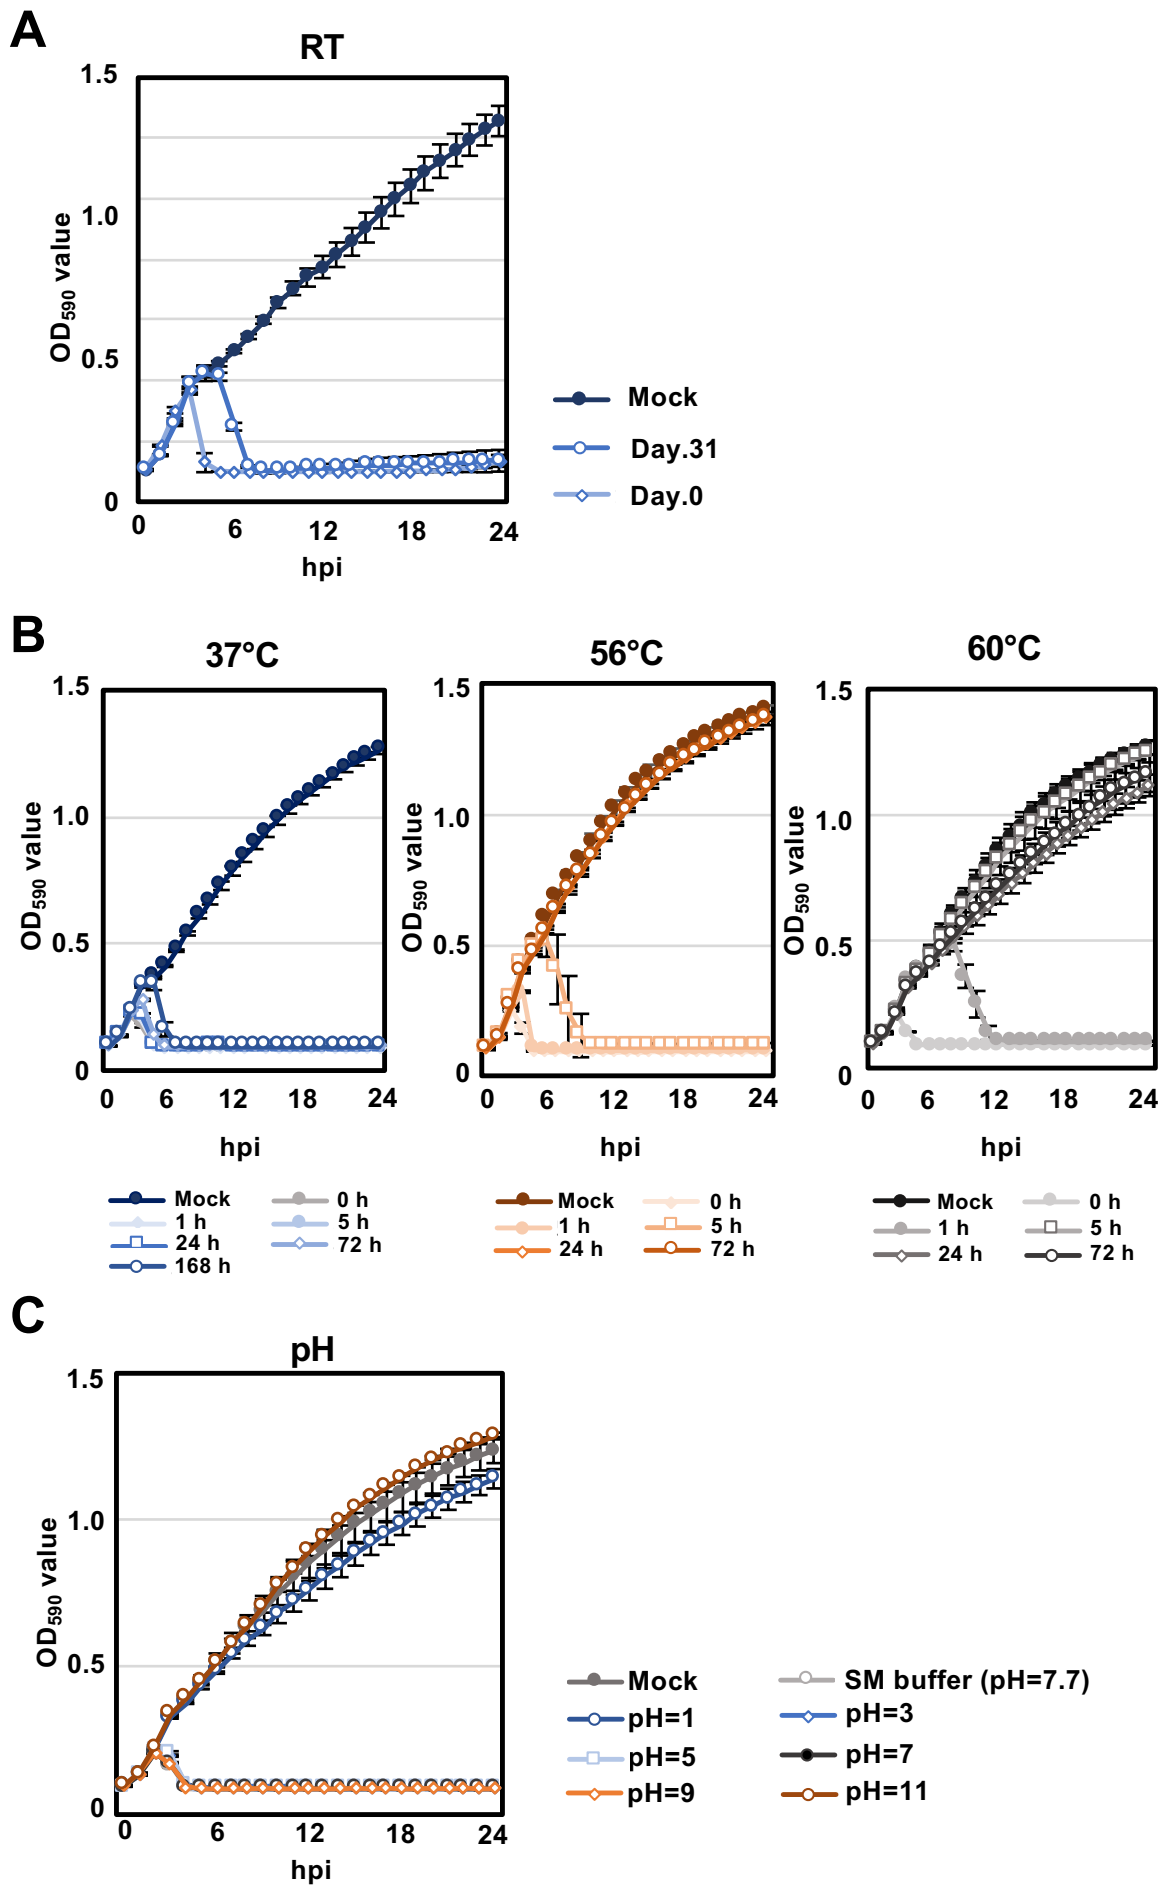

## Figure.S1

**Figure S1. Monitoring of  $\Phi$ SA012 OD value after various environmental stimulations.**

(A) Lytic curves of SA003 growing in the presence of  $\Phi$ SA012 stored at room temperature and 4° C were obtained by monitoring the OD<sub>590</sub> until 24 hpi. The individual points in each lytic curve are presented as means  $\pm$  SD (n = 4). (B) Lytic curves of SA003 growing in the presence of  $\Phi$ SA012 exposed to 37° C, 56° C, and 60° C for specific times were obtained by monitoring the OD<sub>590</sub> until 24 hpi. The individual points in each lytic curve are presented as means  $\pm$  SD (n = 4). (C) Lytic curves of SA003 growing in the presence of  $\Phi$ SA012 exposed to different pH ranges were obtained by monitoring the OD<sub>590</sub> until 24 hpi. The individual points in each lytic curve are presented as means  $\pm$  SD (n = 4).

Figure.S2

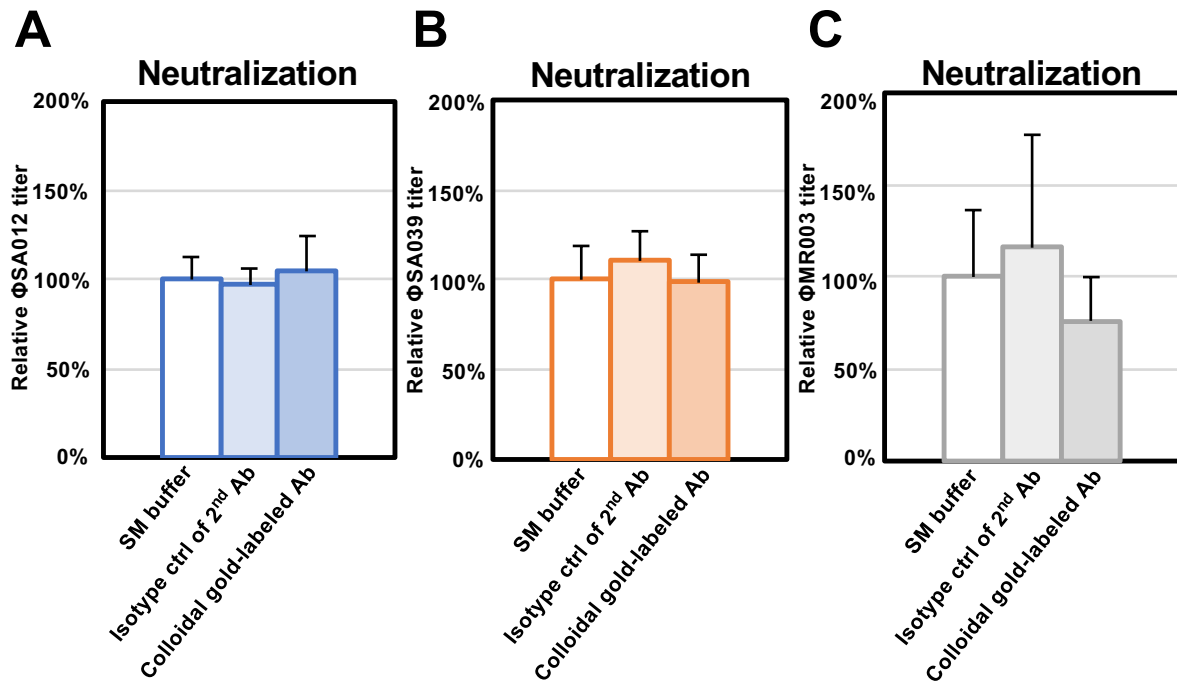

**Figure S2. Effects of secondary and colloidal gold-labeled antibodies on phage plaque-forming activity.**

(A) Effects of antibodies on the plaque-forming activity of  $\Phi$ SA012. (B) Effects of antibodies on the plaque-forming activity of  $\Phi$ SA039. (C) Effects of antibodies on the plaque-forming activity of  $\Phi$ MR003. Titers of each phage are indicated as fold changes against the control (SM buffer treated) and presented as means  $\pm$  SD (n = 3). Significance against the control at each condition was analyzed by Tukey's test based on one-way ANOVA.
